# Supplementary material for: Influence of Environmental Governance on Deforestation in Municipalities of the Brazilian Amazon
Source: PLOS journal article supplement (doi:10.1371/journal.pone.0131425), 2015-07-24

**Trace of a**

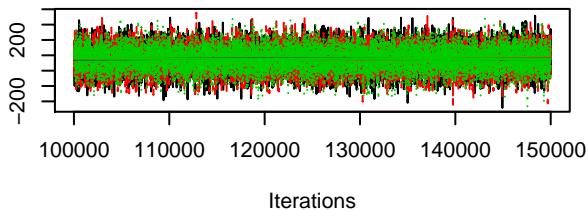

**Density of a**

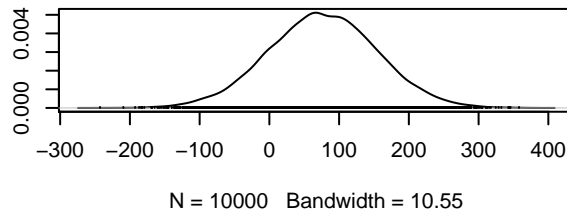

**Trace of b.area**

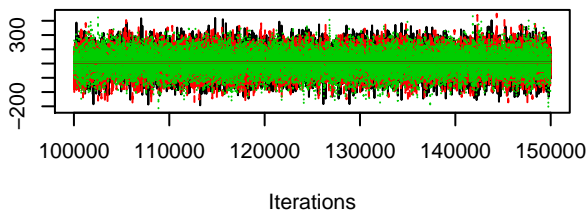

**Density of b.area**

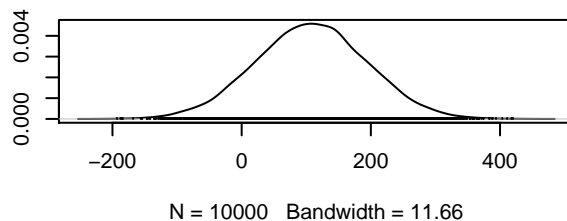

**Trace of b.desmatamento2000**

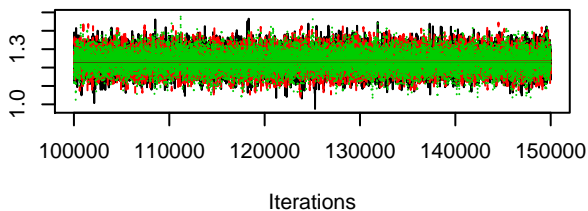

**Density of b.desmatamento2000**

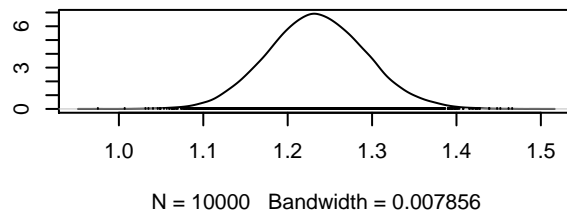

**Trace of b.estradas**

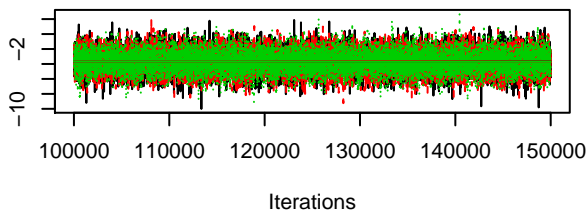

**Density of b.estradas**

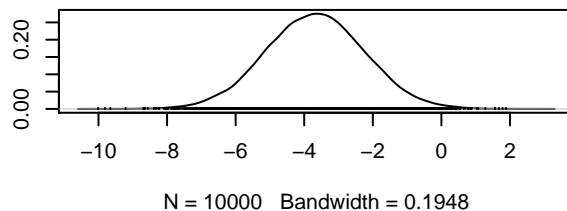

**Trace of b.govamb**

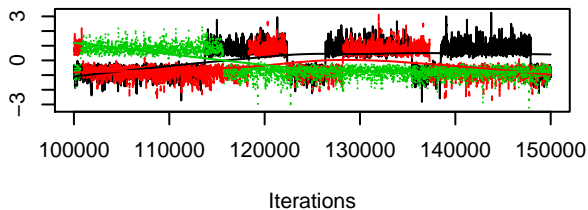

**Density of b.govamb**

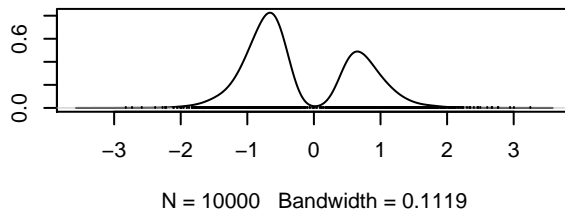

**Trace of b.pib**

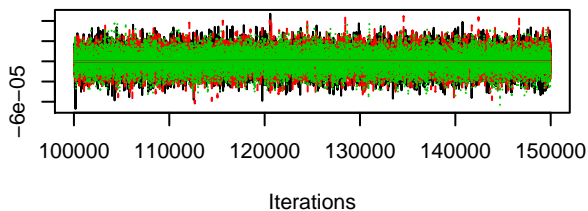

**Density of b.pib**

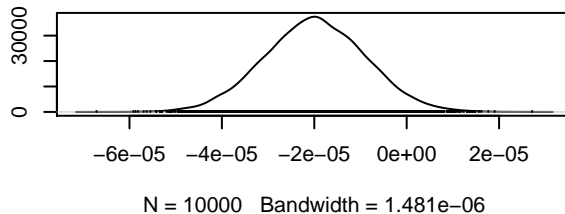

**Trace of w.coleta\_seletiva**

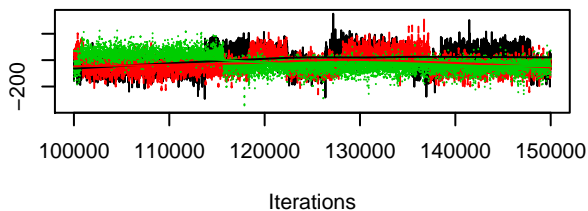

**Density of w.coleta\_seletiva**

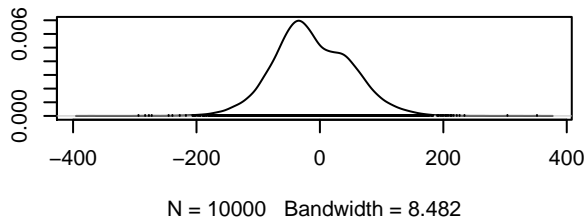

**Trace of w.comite\_bacia**

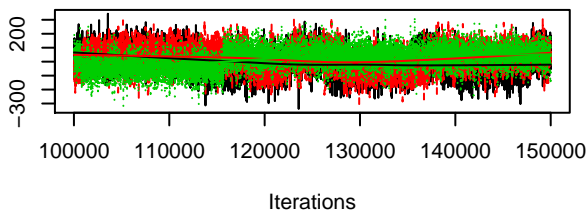

**Density of w.comite\_bacia**

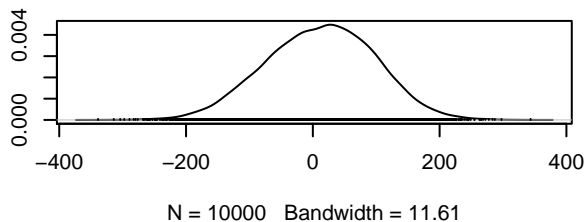

**Trace of w.conselho\_meio\_ambiente**

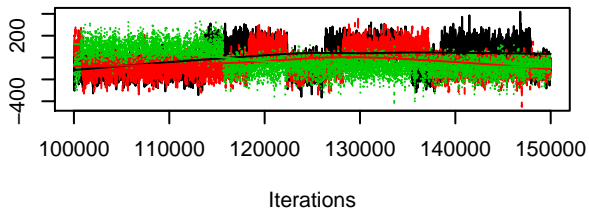

**Density of w.conselho\_meio\_ambiente**

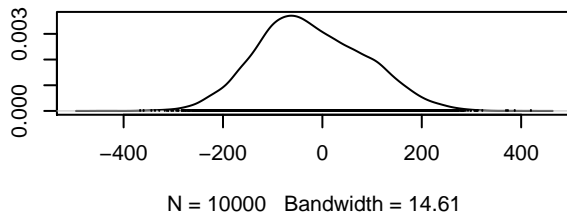

**Trace of w.conselho\_saneamento**

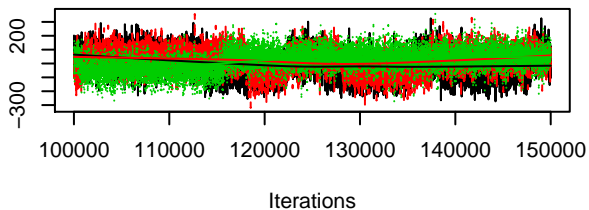

**Density of w.conselho\_saneamento**

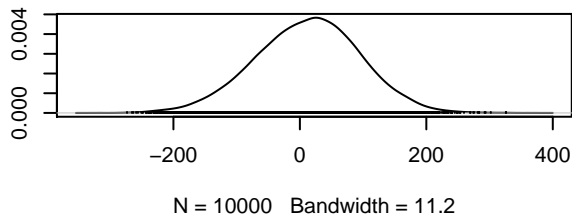

**Trace of w.fundo\_meio\_ambiente**

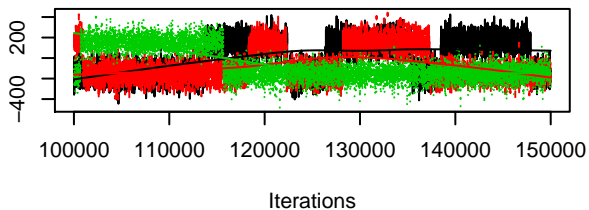

**Density of w.fundo\_meio\_ambiente**

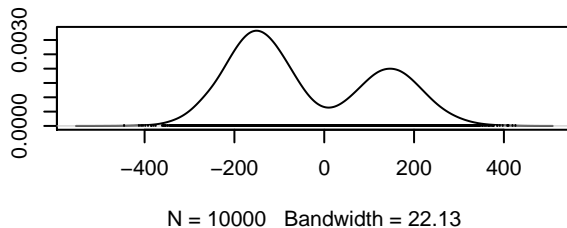

**Trace of w.licenciamento\_impacto\_ambiental**

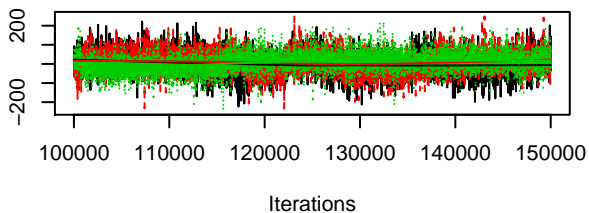

**Density of w.licenciamento\_impacto\_ambiental**

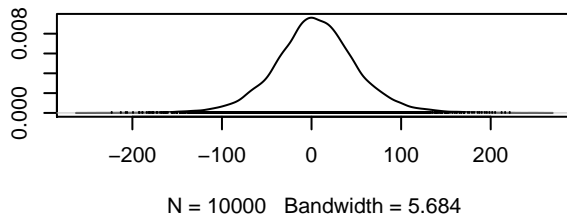

**Trace of w.manejo\_aguas\_urbanas**

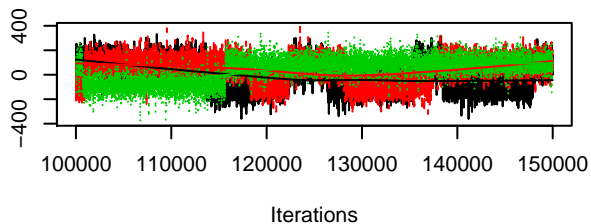

**Density of w.manejo\_aguas\_urbanas**

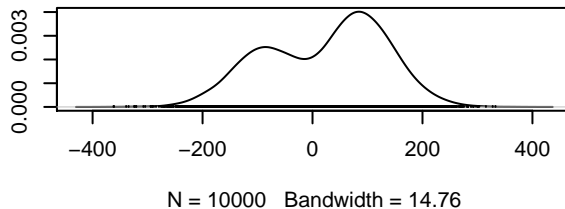

**Trace of w.manejo\_residuos\_solidos**

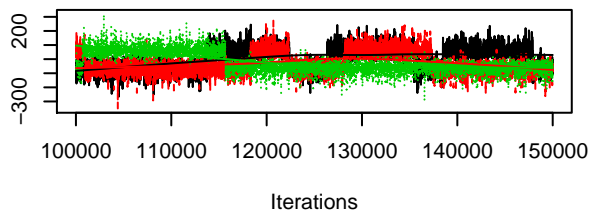

**Density of w.manejo\_residuos\_solidos**

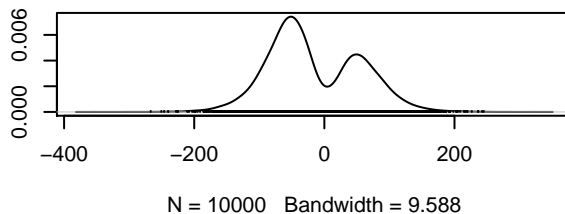

**Trace of w.secretaria\_meio\_ambiente**

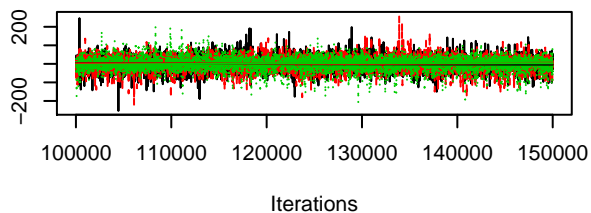

**Density of w.secretaria\_meio\_ambiente**

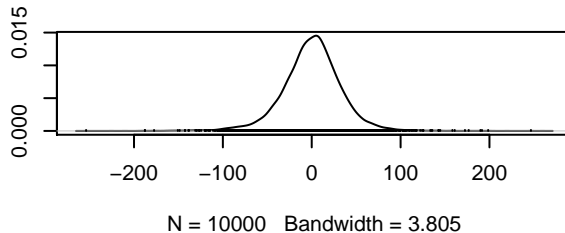

Supplement: S1 (10.1371/journal.pone.0131425.s001) [file journal.pone.0131425.s001]
