# Supplementary figures and images for: Influence of Environmental Governance on Deforestation in Municipalities of the Brazilian Amazon
Source: PLOS journal article supplement (doi:10.1371/journal.pone.0131425), 2015-07-24

**Trace of a**

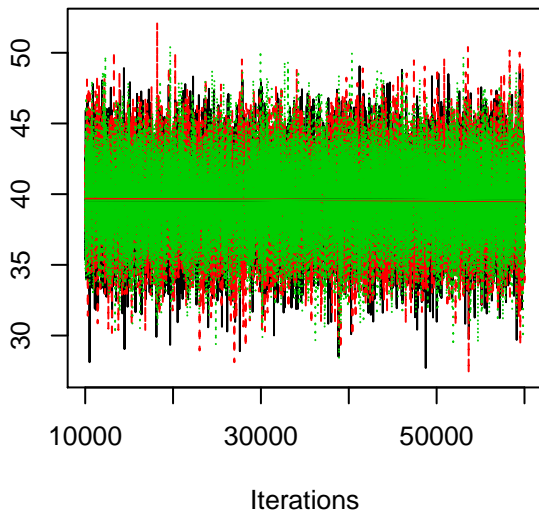

**Density of a**

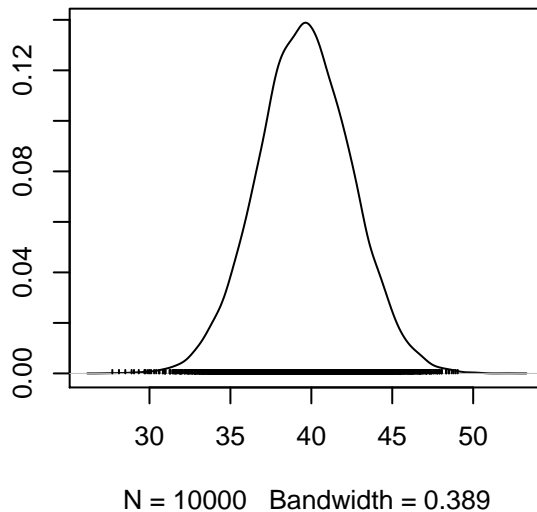

**Trace of b.pib**

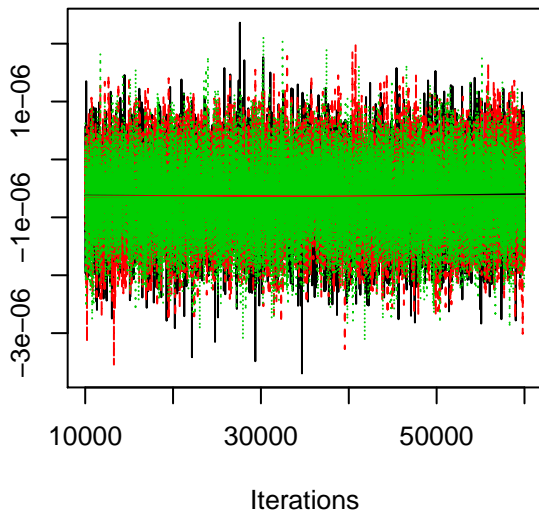

**Density of b.pib**

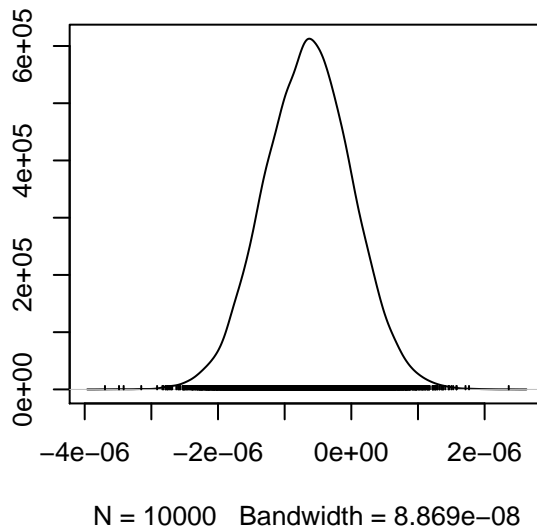

Supplement: S1 (10.1371/journal.pone.0131425.s001) [file journal.pone.0131425.s001]
